# Supplementary material
Source: ML conference proceedings conference paper supplement (https://www.ecva.net/papers/eccv_2020/papers_ECCV/html/123570375_ECCV_2020_paper.php)
Supplement: Supplementary file 2 [file 123570375-supp.zip]

Archive with 5 entries (4 files):
- 1586-supp/
- 1586-supp/.DS_Store
- 1586-supp/1586_video.mp4
- 1586-supp/1586_supp.pdf
- 1586-supp/README.txt
