# Supplementary material
Source: ML conference proceedings conference paper supplement (https://www.ecva.net/papers/eccv_2020/papers_ECCV/html/123570375_ECCV_2020_paper.php)
Supplement: Supplementary file 2 [file 123570375-supp.zip › 1586-supp/README.txt]

This zipped file contains two files.
1. 1586_supp.pdf : This contains details and analysis that supplement the main paper.
2. 1586_video.mp4 : This is a supplemental video that provides visualizations of the content in paper and supplementary
